# Supplementary material for: Recombinant lipidated Zika virus envelope protein domain III elicits durable neutralizing antibody responses against Zika virus in mice
Source: PubMed Central journal article supplement (PMC7158147; doi:10.1186/s12929-020-00646-x), 2020-04-14
Supplement: 12929_2020_646_MOESM1_ESM.pdf [file 12929_2020_646_MOESM1_ESM.pdf]

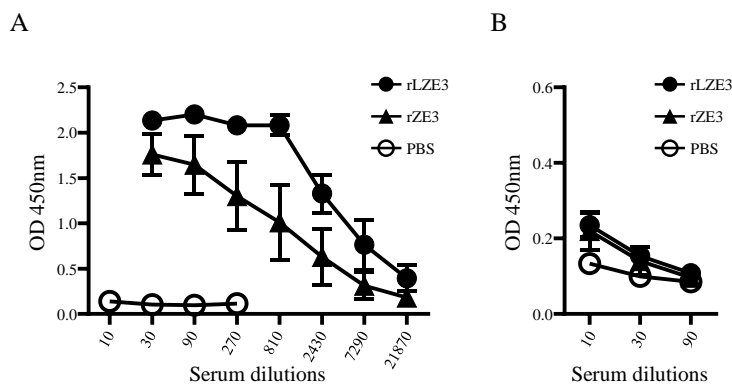

**Figure S1. The capability of rLZE3 induced antibodies bind to rZE3 and dengue-2 virus.** C57BL/6 mice were immunized subcutaneously with PBS (n=4), rZE3 (n=5), or rLZE3 (n=5) (10  $\mu$ g per dose) twice at a two-week interval. Serum samples were collected from immunized mice at 8 weeks after the first immunization. ELISA was performed by using rZE3 (A) or dengue-2 virus (B) as coating antigen. Data represent the mean  $\pm$  SE of the mean.
